# Supplementary material for: Association between Sleep Onset Problem and Subjective Cognitive Complaints among Japanese Older Adults during the Coronavirus Disease 2019 Pandemic
Source: MDPI journal article supplement (doi:10.3390/ijerph20010156), 2022-12-22
Supplement: s1 [file s1]

**Table S1 Characteristics of participants in male group and female group**

| parameter                      | male                |                  |                               | female              |                  |                               |
|--------------------------------|---------------------|------------------|-------------------------------|---------------------|------------------|-------------------------------|
|                                | sleep onset problem |                  | p-value                       | sleep onset problem |                  | p-value                       |
|                                | (+) <i>n</i> =38    | (-) <i>n</i> =92 | (Effect size)                 | (+) <i>n</i> =31    | (-) <i>n</i> =24 | (Effect size)                 |
| Age(years), mean (SD)          | 70.3(4.4)           | 68.7(3.5)        | 0.03 <sup>a</sup><br>(d=0.42) | 71.6(4.8)           | 70.2(4.6)        | 0.52 <sup>a</sup><br>(d=0.30) |
| Education, <i>n</i> (%)        |                     |                  |                               |                     |                  |                               |
| >12 years                      | 3(7.9)              | 1(1.6)           | 0.08 <sup>b</sup><br>(V=0.19) | 0(0.0)              | 1(4.1)           | 0.52 <sup>b</sup><br>(V=0.16) |
| 12years                        | 12(31.6)            | 23(25.3)         |                               | 15(48.4)            | 11(45.8)         |                               |
| <12years                       | 23(60.5)            | 67(73.6)         |                               | 16(51.6)            | 12(50.0)         |                               |
| Living situation, <i>n</i> (%) |                     |                  |                               |                     |                  |                               |
| Alone                          | 4(10.5)             | 9(9.8)           | 1.0 <sup>b</sup>              | 3(9.7)              | 5(20.8)          | 0.44 <sup>b</sup>             |
| With others                    | 34(89.5)            | 83(90.2)         | ( $\varphi$ =0.01)            | 28(90.3)            | 19(79.2)         | ( $\varphi$ =0.16)            |
| Stress condition, <i>n</i> (%) |                     |                  |                               |                     |                  |                               |
| A lot                          | 6(15.8)             | 10(10.9)         | 0.07 <sup>b</sup><br>(V=0.23) | 9(29.0)             | 5(20.8)          | 0.44 <sup>b</sup><br>(V=0.22) |
| Sometimes                      | 20(52.6)            | 21(33.1)         |                               | 19(61.3)            | 13(54.2)         |                               |
| Not so much                    | 11(28.9)            | 40(43.5)         |                               | 2(6.5)              | 5(20.8)          |                               |
| Not at all                     | 1(2.6)              | 11(12.0)         |                               | 1(3.2)              | 1(4.2)           |                               |
| IPAQ level, <i>n</i> (%)       |                     |                  |                               |                     |                  |                               |
| low                            | 14(36.8)            | 35(38.0)         | 0.11 <sup>b</sup><br>(V=0.18) | 18(58.1)            | 13(54.2)         | 0.85 <sup>b</sup><br>(V=0.08) |
| Moderate                       | 17(44.7)            | 26(28.3)         |                               | 7(22.6)             | 7(29.2)          |                               |
| high                           | 7(18.4)             | 31(33.7)         |                               | 6(19.4)             | 4(16.7)          |                               |
| Alcohol amount, <i>n</i> (%)   |                     |                  |                               |                     |                  |                               |
| ≤180ml/day                     | 20(52.6)            | 53(57.6)         | 0.75 <sup>b</sup>             | 29(93.5)            | 22(91.7)         | 1.0 <sup>b</sup>              |
| >180ml/day                     | 18(47.4)            | 39(42.4)         | ( $\varphi$ =0.05)            | 2(6.5)              | 2(8.3)           | ( $\varphi$ =0.04)            |
| Job status, <i>n</i> (%)       |                     |                  |                               |                     |                  |                               |
| employed                       | 20(52.6)            | 42(42.5)         | 0.39 <sup>b</sup>             | 6(19.4)             | 4(16.7)          | 1.0 <sup>b</sup>              |
| unemployed                     | 18(47.4)            | 50(57.5)         | ( $\varphi$ =0.09)            | 25(80.6)            | 20(83.3)         | ( $\varphi$ =0.04)            |

IPAQ; International Physical Activity Questionnaire, <sup>a</sup> Student's t-test. <sup>b</sup> Pearson's chi-square, d; Cohen's d,  $\varphi$ ; phi coefficient, V; Cramer's V

Table S2 Comparison of Sleep duration and quality, and SCC between the participant with and without sleep onset problem in male group and female group

| parameter                                           | male                |                  |                                        | female              |                  |                                        |
|-----------------------------------------------------|---------------------|------------------|----------------------------------------|---------------------|------------------|----------------------------------------|
|                                                     | sleep onset problem |                  | p-value                                | sleep onset problem |                  | p-value                                |
|                                                     | (+) <i>n</i> =38    | (-) <i>n</i> =92 | (Effect size)                          | (+) <i>n</i> =31    | (-) <i>n</i> =24 | (Effect size)                          |
| Sleep duration,<br>min/day, mean (SD)               | 431.8(78.9)         | 434.3(58.4)      | 0.84 <sup>a</sup><br>( <i>d</i> =0.04) | 419.7(58.7)         | 419.6(63.1)      | 0.99 <sup>a</sup><br>( <i>d</i> =0.03) |
| A refreshing awakening in the morning, <i>n</i> (%) |                     |                  |                                        |                     |                  |                                        |
| Always                                              | 8(21.1)             | 61(66.3)         |                                        | 5(16.1)             | 16(66.7)         |                                        |
| Sometimes                                           | 18(47.4)            | 24(26.1)         | <0.001 <sup>b</sup>                    | 17(54.8)            | 6(25.0)          | 0.002 <sup>b</sup>                     |
| Not much                                            | 11(28.9)            | 4(4.3)           | ( <i>V</i> =0.46)                      | 8(25.8)             | 2(8.3)           | ( <i>V</i> =0.52)                      |
| Not at all                                          | 1(2.6)              | 3(3.3)           |                                        | 1(3.2)              | 0(0.0)           |                                        |
| Use of sleep medications, <i>n</i> (%)              |                     |                  |                                        |                     |                  |                                        |
| Not at all                                          | 31(81.6)            | 91(98.9)         |                                        | 23(74.2)            | 23(95.8)         |                                        |
| Less than once a week                               | 0(0.0)              | 0(0.0)           | 0.001 <sup>b</sup>                     | 3(9.7)              | 1(4.2)           | 0.16 <sup>b</sup>                      |
| 1~2times a week                                     | 1(2.0)              | 0(0.0)           | ( <i>V</i> =0.39)                      | 2(6.5)              | 0(0.0)           | ( <i>V</i> =0.34)                      |
| 3times or more a week                               | 6(15.8)             | 1(1.1)           |                                        | 3(9.7)              | 0(0.0)           |                                        |
| Scheduled memory decline, <i>n</i> (%)              |                     |                  |                                        |                     |                  |                                        |
| Always                                              | 1(2.6)              | 2(2.2)           |                                        | 4(12.9)             | 2(8.3)           |                                        |
| Sometimes                                           | 22(57.9)            | 25(27.2)         | 0.004 <sup>b</sup>                     | 16(51.6)            | 5(20.8)          | 0.03 <sup>b</sup>                      |
| Not at all                                          | 15(39.5)            | 65(70.7)         | ( <i>V</i> =0.29)                      | 11(35.5)            | 17(70.8)         | ( <i>V</i> =0.36)                      |
| Misplacement, <i>n</i> (%)                          |                     |                  |                                        |                     |                  |                                        |
| Always                                              | 2(5.3)              | 4(4.3)           |                                        | 2(6.5)              | 2(8.3)           |                                        |
| Sometimes                                           | 22(57.9)            | 40(43.5)         | 0.28 <sup>b</sup>                      | 18(58.1)            | 5(20.8)          | 0.02 <sup>b</sup>                      |
| Not at all                                          | 14(36.8)            | 48(52.2)         | ( <i>V</i> =0.14)                      | 11(35.5)            | 17(70.8)         | ( <i>V</i> =0.38)                      |
| Disorientation in place, <i>n</i> (%)               |                     |                  |                                        |                     |                  |                                        |
| Always                                              | 0(0.0)              | 1(1.1)           |                                        | 0(0.0)              | 0(0.0)           |                                        |
| Sometimes                                           | 0(0.0)              | 3(3.3)           | 0.43 <sup>b</sup>                      | 2(6.5)              | 2(8.3)           | 1.00 <sup>b</sup>                      |
| Not at all                                          | 38(100)             | 89(95.7)         | ( <i>V</i> =0.12)                      | 29(93.5)            | 22(91.7)         | ( <i>V</i> =0.04)                      |
| Disorientation in time, <i>n</i> (%)                |                     |                  |                                        |                     |                  |                                        |

|                                   |          |          |                                 |          |          |                               |
|-----------------------------------|----------|----------|---------------------------------|----------|----------|-------------------------------|
| Always                            | 0(0.0)   | 2(2.2)   | <0.001 <sup>b</sup><br>(V=0.36) | 1(3.2)   | 0(0.0)   | 0.59 <sup>b</sup><br>(V=0.14) |
| Sometimes                         | 12(31.6) | 5(5.4)   |                                 | 12(38.7) | 8(33.3)  |                               |
| Not at all                        | 26(68.4) | 85(92.4) |                                 | 18(58.1) | 16(66.7) |                               |
| Word recall decline, <i>n</i> (%) |          |          |                                 |          |          |                               |
| Always                            | 7(18.4)  | 6(6.5)   | 0.004 <sup>b</sup><br>(V=0.29)  | 1(3.2)   | 4(16.7)  | 0.18 <sup>b</sup><br>(V=0.25) |
| Sometimes                         | 23(60.5) | 40(43.5) |                                 | 21(67.7) | 12(50.0) |                               |
| Not at all                        | 8(21.1)  | 46(50.0) |                                 | 9(29.0)  | 8(33.3)  |                               |
| Forgetfulness, <i>n</i> (%)       |          |          |                                 |          |          |                               |
| Always                            | 6(15.8)  | 7(7.6)   | 0.003 <sup>b</sup><br>(V=0.29)  | 4(12.9)  | 3(12.5)  | 0.15 <sup>b</sup><br>(V=0.26) |
| Sometimes                         | 30(78.9) | 55(59.8) |                                 | 25(80.9) | 15(62.5) |                               |
| Not at all                        | 2(5.3)   | 30(32.6) |                                 | 2(6.5)   | 6(25.0)  |                               |

<sup>a</sup> Student's t-test, <sup>b</sup> Pearson's chi-square, d; Cohen's d,  $\phi$ ; phi coefficient, V; Cramer's V
